# Supplementary material
Source: PubMed Central journal article supplement (PMC8634520)
Supplement: NIHMS1545383-supplement-7.pdf [file NIHMS1545383-supplement-7.pdf]

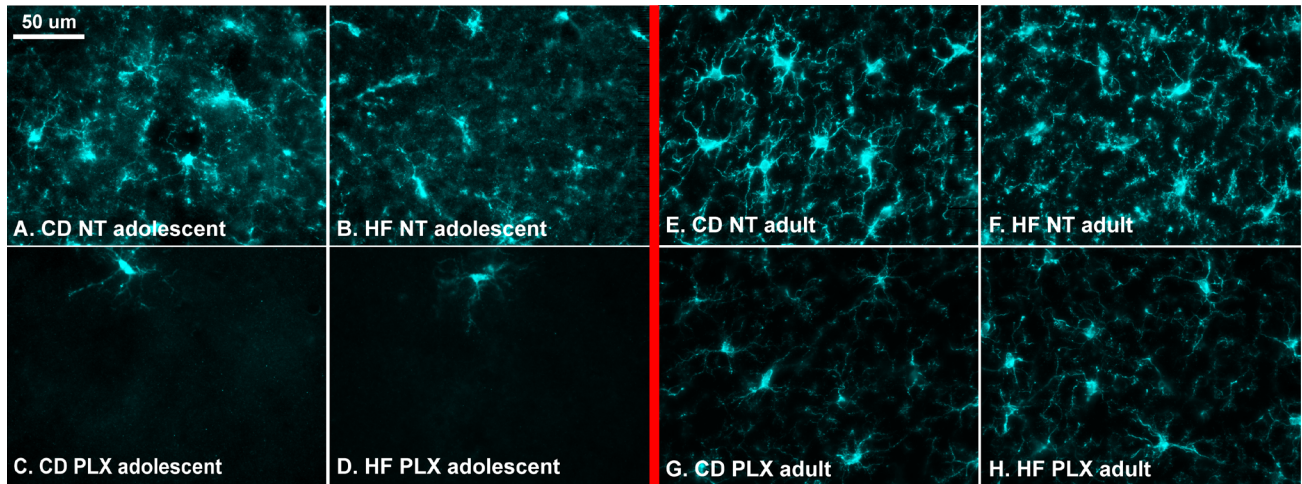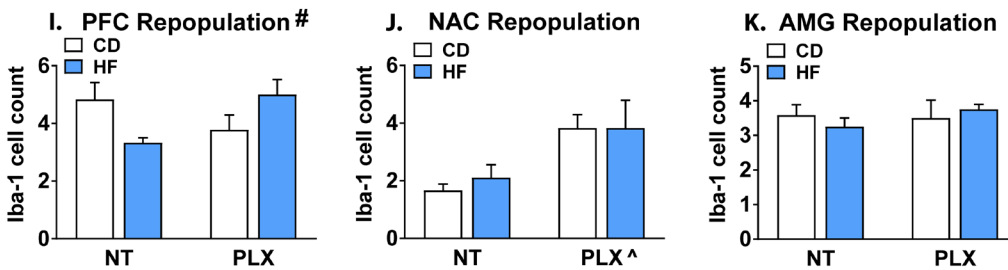

**Figure S1:** Representative 40x images of Iba-1 immunohistochemistry in the medial PFC of (A-D) adolescent males on the last day of PLX treatment, with microglia present in (A) CD NT and (B) HF NT but nearly depleted from (C) CD PLX and (D) HF PLX tissue. (E-H) Adult males after 3 weeks recovery from PLX, at the age when experimental animals started operant training, depicting (E) CD NT (F) HF NT microglia and repopulated microglia in (G) CD PLX and (H) HF PLX tissue. (I) In the PFC after repopulation, HF diet differentially affected male Iba1 cell counts based on PLX treatment. (J) In the NAC after repopulation, PLX treatment increased male Iba1 cell counts. (K) In the AMG after repopulation, male Iba1 cell counts were not affected by HF diet or PLX treatment. Tissue was labeled with Iba-1 antibody from (A-D) Synaptic Systems and (E-K) Wako. (# $p < 0.05$  diet x treatment interaction; ^  $p < 0.05$  main effect of PLX;  $n = 3/\text{group}$ ) (HF = offspring of maternal high fat diet; CD = offspring of maternal control diet; PLX = adolescent PLX3397 treatment; NT = not treated during adolescence)

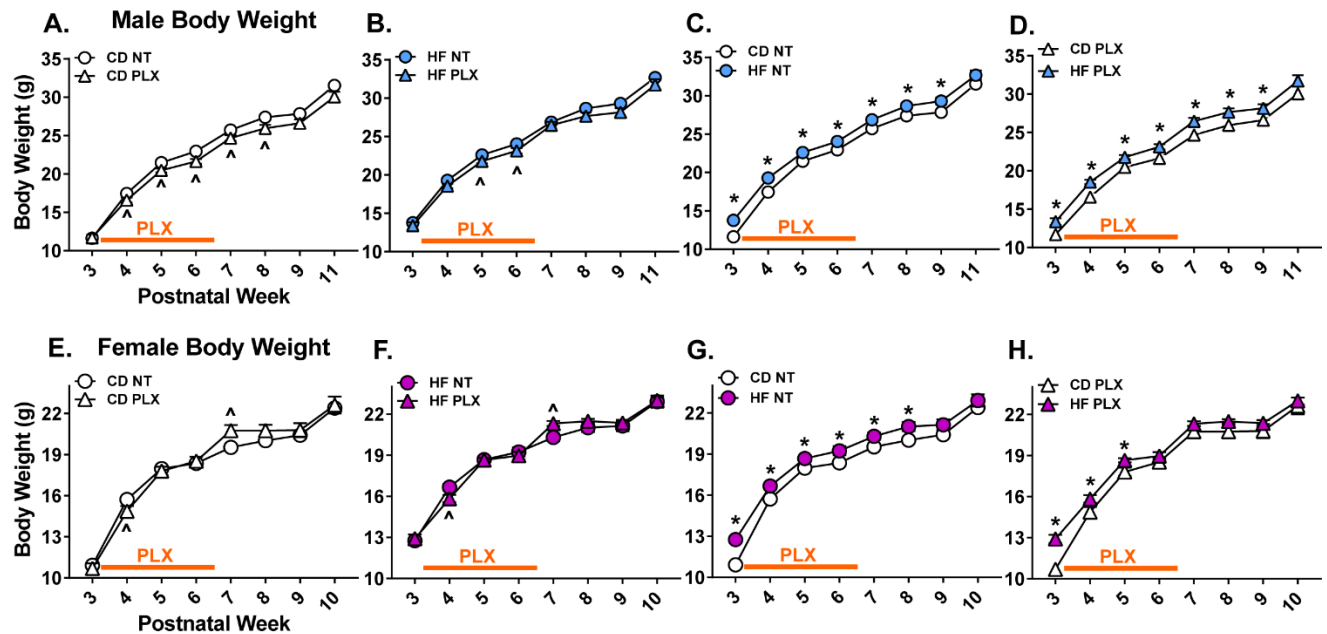

**Figure S2:** (A-D) For clarity, data are presented in two ways; (1) demonstrating the PLX effect (A, B, E, F) and (2) demonstrating the HF diet effect (C, D, G, H). Male offspring body weights from weaning until the start of food restriction at 11 weeks of age showed a significant between-subjects main effect of treatment [ $F_{(1,58)} = 7.1$ ;  $p = 0.01$ ] and diet [ $F_{(1,58)} = 19.9$ ;  $p < 0.001$ ] and a significant within-subjects effect of week [ $F_{(7, 406)} = 2892.1$ ;  $p < 0.001$ ]. PLX treatment decreased male body weight at postnatal weeks (A) 4-8 in CD and (B) 5-6 weeks in HF offspring ( $p < 0.05$ ). HF male offspring were heavier than their CD counterparts at 3-9 weeks of age, both in (C) NT and (D) PLX groups ( $p < 0.05$ ). By 11 weeks of age when males initiated food restriction for operant testing, there were no differences between groups. (E-H) Female offspring body weights revealed a significant between-subjects main effect of diet [ $F_{(1,58)} = 11.3$ ;  $p = 0.001$ ] and significant within-subjects effects of week [ $F_{(7, 406)} = 1507.8$ ;  $p < 0.001$ ], week\*treatment [ $F_{(7, 406)} = 10.2$ ;  $p < 0.001$ ], and week\*diet [ $F_{(7, 406)} = 7.4$ ;  $p < 0.001$ ] interactions. PLX decreased female body weight at postnatal week 4 and increased it on week 7 in both the (E) CD and (F) HF groups ( $p < 0.05$ ). HF female offspring were heavier than the respective CD mice at postnatal (G) weeks 3-8 in NT groups and (H) weeks 3-5 in PLX groups ( $p < 0.05$ ). By 10 weeks of age when female mice initiated food restriction for operant testing, there were no differences between groups. (\* $p < 0.05$  vs. respective CD group; ^  $p < 0.05$  vs. respective NT group;  $n = 15-16$ /group) (HF = offspring of maternal high fat diet; CD = offspring of maternal control diet; PLX = adolescent PLX3397 treatment; NT = not treated during adolescence)

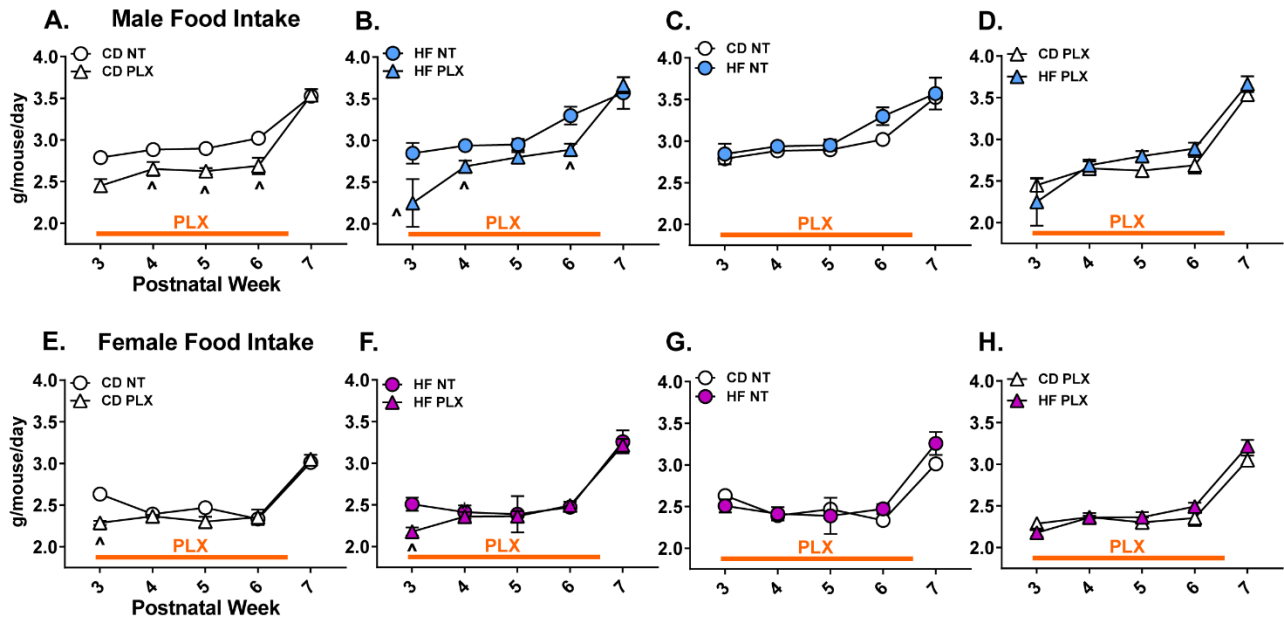

**Figure S3:** (A-D) For clarity, data are presented in two ways; (1) demonstrating the PLX effect (A, B, E, F) and (2) demonstrating the HF diet effect (C, D, G, H). For food intake in the males, there were significant within-subjects effects of week [ $F_{(4, 48)} = 62.5$ ;  $p < 0.001$ ] and week\*treatment interaction [ $F_{(4, 48)} = 4.2$ ;  $p = 0.02$ ]. There was also a between-subjects effect of treatment [ $F_{(1, 12)} = 12.6$ ;  $p = 0.004$ ]. PLX treated males ate significantly less on (A) weeks 4-6 in the CD group and on (B) weeks 3, 4, and 6 in the HF group ( $p < 0.05$ ). There were no significant differences in male food intake on week 7 when all mice were switched to house chow, suggesting that PLX decreased intake due to taste and not a side effect of the drug. (C, D) There were no effects of maternal diet on food intake. (E-H) For food intake in the females, there was a significant within-subjects effect of week [ $F_{(4, 48)} = 71.7$ ;  $p < 0.001$ ] and week\*treatment interaction [ $F_{(4, 48)} = 3.4$ ;  $p = 0.043$ ]. PLX females consumed significantly less food on postnatal week 3 only, both in (E) CD and (F) HF groups ( $p < 0.05$ ). This further suggests that the decrease in food intake is due to the taste of PLX and not a side effect. (G, H) There were again no effects of maternal diet on food intake. Overall, perinatal HF diet and adolescent PLX treatment had separate effects on food intake and body weight. Perinatal HF diet increased offspring body weight without increasing food intake, an effect that was most pronounced at weaning and dissipated over time. PLX treatment decreased food intake, more dramatically initially and more pronounced in the males, resulting in a decreased body weight that normalized quickly after switching to house chow. (\* $p < 0.05$  vs. respective CD group;  $^{\wedge} p < 0.05$  vs. respective NT group;  $n = 3-4$  cages of 4 mice/group) (HF = offspring of maternal high fat diet; CD = offspring of maternal control diet; PLX = adolescent PLX3397 treatment; NT = not treated during adolescence)

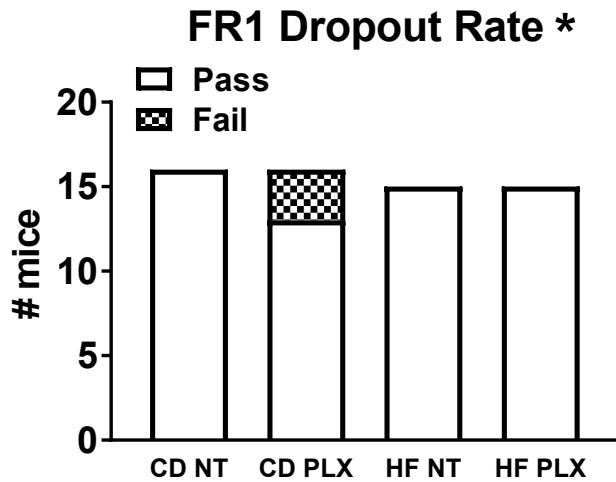

**Figure S4:** In male fixed ratio 1 (FR1), Chi<sup>2</sup> analysis revealed a significant difference in pass vs. fail outcomes for the number of mice that passed or failed the 70 trial criterion after 14 days. All mice in the CD NT (n = 16), HF NT (n = 15), and HF PLX (n = 15) groups passed criterion but 3 out of 16 mice in the CD PLX group failed to reach criterion. (\*p < 0.05) (HF = offspring of maternal high fat diet; CD = offspring of maternal control diet; PLX = adolescent PLX3397 treatment; NT = not treated during adolescence)

| <b>Description</b>          | <b>Abet II schedule name</b>                                      |
|-----------------------------|-------------------------------------------------------------------|
| FR1 habituation             | Robbins: 5 choice habituation 2 v2                                |
| FR1                         | Cam: Center Only – Mouse Must Touch training v2                   |
| PR                          | Cam: Progressive Ratio (custom)                                   |
| 5CSRTT habituation          | Robbins: 5 Choice Mouse Must Touch                                |
| 5CSRTT (16, 8, 4 s stimuli) | Robbins: 5-choice Mouse Touch basic v3 (session value 10, 11, 12) |
| Titration                   | Robbins: Titration 5-choice mouse touch basic v3                  |

**Table S1.** List of Abet II pre-programmed schedules used for male operant training and testing.

| Gene name        | Function                                                                                                                      | TaqMan assay ID |
|------------------|-------------------------------------------------------------------------------------------------------------------------------|-----------------|
| Actb             | HK                                                                                                                            | Ref: 4352663    |
| C1qa             | Complement C1q A chain: complement recognition, predominantly microglial <sup>1</sup>                                         | Mm00432142_m1   |
| Cnr1             | Cannabinoid receptor 1: mostly neuronal                                                                                       | Mm1212171_s1    |
| Csf1r            | Colony stimulating factor 1: trophic factor needed for microglial survival <sup>2,3</sup>                                     | Mm1266652_m1    |
| Cx3cl1           | Chemokine ligand 1: CXC chemokine expressed by neurons and endothelial cells to recruit neutrophils <sup>4</sup>              | Mm00436454_m1   |
| Cx3cr1           | Fractalkine receptor: expressed in immune cells and microglia to recognize cx3cl1 <sup>5,6</sup>                              | Mm02620111_s1   |
| Dlg4 (PSD95)     | Discs Large MAGUK Scaffold Protein 4: postsynaptic density protein 95                                                         | Mm00492193_m1   |
| Dnmt1            | DNA Methyltransferase 1: maintains DNA methylation <sup>7</sup>                                                               | Mm01151063_m1   |
| Dnmt3a           | DNA Methyltransferase 3 Alpha: de novo DNA methylation <sup>7</sup>                                                           | Mm00432881_m1   |
| Drd1a            | Dopamine receptor D1                                                                                                          | Mm01353211_m1   |
| Drd2             | Dopamine receptor D2                                                                                                          | Mm00438545_m1   |
| Fos              | Proto-oncogene c-Fos: immediate early gene                                                                                    | Mm00487425_m1   |
| Gad1             | Glutamate Decarboxylase 1: catalyzes GABA production                                                                          | Mm04207432_g1   |
| Gadd45b          | Growth Arrest And DNA Damage Inducible Beta: DNA demethylation <sup>8</sup>                                                   | Mm00435123_m1   |
| Gapdh            | HK                                                                                                                            | Ref: 4352661    |
| Gphn             | Gephyrin: inhibitory neurotransmission                                                                                        | Mm00556895_m1   |
| Grin2b           | GluN2B subunit: variants involved in neurodevelopmental disorders <sup>9</sup>                                                | Mm00433820_m1   |
| Hprt1            | HK                                                                                                                            | Mm01324427_m1   |
| Itgam            | Integrin Subunit Alpha M (CD11b; CR3): macrophage/microglial adhesion for phagocytosis                                        | Mm01271250_m1   |
| Mecp2            | Methyl-CpG binding protein 2: chromatin regulation and development of neuronal networks <sup>10</sup>                         | Mm01193537_g1   |
| Oprd1            | Opioid Receptor Delta 1                                                                                                       | Mm01180757_m1   |
| Oprk1            | Opioid Receptor Kappa 1                                                                                                       | Mm01230885_m1   |
| Oprm1            | Opioid Receptor Mu 1                                                                                                          | Mm01188089_m1   |
| Penk1            | Preproenkephalin                                                                                                              | Mm01212875_m1   |
| Ppia             | HK                                                                                                                            | Mm02342429_g1   |
| Ppp1r1b          | Protein Phosphatase 1 Regulatory Inhibitor Subunit 1B (DARPP-32): neuronal phosphoprotein regulated by dopamine <sup>11</sup> | Mm00454892_m1   |
| Setd7            | SET Domain Containing 7, Histone Lysine Methyltransferase: regulates DNMT1 activity <sup>12</sup>                             | Mm00499823_m1   |
| Slc17a7 (vglut1) | Solute Carrier Family 17 Member 7 (Vesicular glutamate transporter 1): presynaptic glutamate uptake                           | Mm00812886_m1   |
| Slc6a3 (DAT)     | Solute Carrier Family 6 Member 3 (Dopamine Transporter): dopamine clearance/reuptake from synapses                            | Mm00438388_m1   |
| Syp              | Synaptophysin: neuronal synaptic vesicle glycoprotein                                                                         | Mm00436850_m1   |
| TH               | Tyrosine Hydroxylase: catalyzes dopamine precursor production                                                                 | Mm00447557_m1   |
| Ywhaz            | HK                                                                                                                            | Mm03950126_s1   |

**Table S2.** List of Fluidigm targets, functions, and assay ID's (HK = housekeeping gene)

| Gene                  | AMG                                                                                                                                                          | NAC                                                                                    | PFC                                                                              |
|-----------------------|--------------------------------------------------------------------------------------------------------------------------------------------------------------|----------------------------------------------------------------------------------------|----------------------------------------------------------------------------------|
| C1qa                  | # Diet x Treatment<br>[F <sub>(1, 28)</sub> = 4.3; p = 0.047]<br><b>^ Treatment</b><br>[F <sub>(1, 28)</sub> = 8.1; p = 0.008]<br>(CD PLX ↑ vs. CD NT)       | <b>^ Treatment</b><br>[F <sub>(1, 24)</sub> = 5.6; p = 0.027]<br>(PLX ↑ vs. NT)        | <b>^ Treatment</b><br>[F <sub>(1, 29)</sub> = 15.6; p < 0.001]<br>(PLX ↑ vs. NT) |
| Csf1r                 | n.s.                                                                                                                                                         | # Diet x Treatment<br>[F <sub>(1, 24)</sub> = 4.9; p = 0.036]<br>(HF PLX ↑ vs. CD PLX) | n.s.                                                                             |
| Cx3cr1                | <b>^ Treatment</b><br>[F <sub>(1, 28)</sub> = 4.2; p = 0.0498]<br>(PLX ↓ vs. NT)                                                                             | <b>* Diet</b><br>[F <sub>(1, 24)</sub> = 4.3; p = 0.0497]<br>(HF ↑ vs. CD)             | n.s.                                                                             |
| Dlg4<br>(Psd95)       | <b>* Diet</b><br>[F <sub>(1, 28)</sub> = 4.3; p = 0.048]<br>(HF ↑ vs. CD)<br><b>^ Treatment</b><br>[F <sub>(1, 28)</sub> = 4.7; p = 0.038]<br>(PLX ↓ vs. NT) | n.s.                                                                                   | n.s.                                                                             |
| Dnmt1                 | <b>^ Treatment</b><br>[F <sub>(1, 28)</sub> = 8.7; p = 0.006]<br>(PLX ↓ vs. NT)                                                                              | n.s.                                                                                   | n.s.                                                                             |
| Drd1a                 | # Diet x Treatment<br>[F <sub>(1, 28)</sub> = 4.9; p = 0.036]<br>(HF PLX ↓ vs. CD PLX)                                                                       | n.s.                                                                                   | n.s.                                                                             |
| Fos                   | <b>^ Treatment</b><br>[F <sub>(1, 28)</sub> = 6.4; p = 0.018]<br>(PLX ↑ vs. NT)                                                                              | <b>* Diet</b><br>[F <sub>(1, 24)</sub> = 5.4; p = 0.028]<br>(HF ↑ vs. CD)              | n.s.                                                                             |
| Gadd45b               | n.s.                                                                                                                                                         | <b>^ Treatment</b><br>[F <sub>(1, 24)</sub> = 5.9; p = 0.022]<br>(PLX ↑ vs. NT)        | n.s.                                                                             |
| Grin2b                | # Diet x Treatment<br>[F <sub>(1, 28)</sub> = 7.7; p = 0.0098]<br>(HF PLX ↑ vs. CD PLX)<br>(CD PLX ↓ vs. CD NT)                                              | n.s.                                                                                   | n.s.                                                                             |
| Oprk1                 | <b>* Diet</b><br>[F <sub>(1, 28)</sub> = 4.7; p = 0.038]<br>(HF ↓ vs. CD)                                                                                    | n.s.                                                                                   | n.s.                                                                             |
| Ppp1r1b<br>(Darpp-32) | # Diet x Treatment<br>[F <sub>(1, 28)</sub> = 4.5; p = 0.043]<br>(HF PLX ↓ vs. CD PLX)                                                                       | n.s.                                                                                   | n.s.                                                                             |
| Setd7                 | <b>* Diet</b><br>[F <sub>(1, 28)</sub> = 6.3; p = 0.018]<br>(HF ↑ vs. CD)                                                                                    | n.s.                                                                                   | n.s.                                                                             |
| Slc6a3<br>(DAT)       | n.s.                                                                                                                                                         | <b>^ Treatment</b><br>[F <sub>(1, 24)</sub> = 6.3; p = 0.019]<br>(PLX ↓ vs. NT)        | n.s.                                                                             |
| Slc17a7<br>(Vglut1)   | <b>* Diet</b><br>[F <sub>(1, 28)</sub> = 9.1; p = 0.0054]<br>(HF ↑ vs. CD)                                                                                   | n.s.                                                                                   | n.s.                                                                             |
| Syp                   | n.s.                                                                                                                                                         | n.s.                                                                                   | <b>* Diet</b><br>[F <sub>(1, 29)</sub> = 6.3; p = 0.018]<br>(HF ↑ vs. CD)        |
| Th                    | # Diet x Treatment<br>[F <sub>(1, 28)</sub> = 4.3; p = 0.046]<br><b>* Diet</b><br>[F <sub>(1, 28)</sub> = 6.9; p = 0.014]<br>(HF PLX ↓ vs. CD PLX)           | <b>^ Treatment</b><br>[F <sub>(1, 24)</sub> = 7.1; p = 0.014]<br>(PLX ↓ vs. NT)        | n.s.                                                                             |

**Table S3.** Statistical results for high-throughput qPCR from male brains after the final day of 5CSRTT behavioral testing, after all mice performed the titration schedule for at least two consecutive days. Of the 27 targets, these 16 targets presented in the table revealed significant differences in at least one brain region. The remaining 11 targets with no significant differences are not shown (*cnr1*, *cx3cl1*, *dnmt3a*, *drd2*, *gad1*, *gephryin*, *cr3*, *mecp2*, *opr1*, *oprm1*, and *penk*). (n = 7-8/group) (AMG = amygdala; NAC = nucleus accumbens; PFC = prefrontal cortex; HF = offspring of maternal high fat diet; CD = offspring of maternal control diet; PLX = adolescent PLX3397 treatment; NT = not treated during adolescence; n.s. = no significant results)



## References

1. Fonseca, M. I. *et al.* Cell-specific deletion of C1qa identifies microglia as the dominant source of C1q in mouse brain. *J. Neuroinflammation* **14**, 1–15 (2017).
2. Bohlen, C. J. *et al.* Diverse Requirements for Microglial Survival, Specification, and Function Revealed by Defined-Medium Cultures. *Neuron* **94**, 759–773.e8 (2017).
3. Renee, M. *et al.* CSF1 receptor signaling is necessary for microglia viability, which unmasks a cell that rapidly repopulates the microglia-depleted adult brain. *Neuron* **82**, 380–397 (2015).
4. Johnson, E. A. *et al.* Increased expression of the chemokines CXCL1 and MIP-1 $\alpha$  by resident brain cells precedes neutrophil infiltration in the brain following prolonged soman-induced status epilepticus in rats. *J. Neuroinflammation* **8**, 1–10 (2011).
5. Wolf, Y., Yona, S., Kim, K.-W. & Jung, S. Microglia, seen from the CX3CR1 angle. *Front. Cell. Neurosci.* **7**, 1–9 (2013).
6. Lee, M., Lee, Y., Song, J., Lee, J. & Chang, S. Chemokine (C-X3-C Motif) Ligand 1 (Cx3CL1) and Chemokine (C-X3-C Motif) Receptor 1 (Cx3CR1). *Immune Netw.* **18**, 1–19 (2018).
7. Horsburgh, S., Robson-Ansley, P., Adams, R. & Smith, C. Exercise and inflammation-related epigenetic modifications: focus on DNA methylation. *Exerc Immunol Rev* **21**, 26–41 (2015).
8. Gavin, D. P. *et al.* Growth arrest and DNA-damage-inducible, beta (GADD45b)-mediated DNA demethylation in major psychosis. *Neuropsychopharmacology* **37**, 531–542 (2012).
9. Hu, C., Chen, W., Myers, S. J., Yuan, H. & Traynelis, S. F. Human GRIN2B variants in neurodevelopmental disorders. *J. Pharmacol. Sci.* **132**, 115–121 (2016).
10. Sun, Y. *et al.* Loss of MeCP2 in immature neurons leads to impaired network integration. *Hum. Mol. Genet.* **28**, 245–257 (2019).
11. Hemmings, H. C., Greengard, P., Tung, H. Y. L. & Cohen, P. DARPP-32, a dopamine-regulated neuronal phosphoprotein, is a potent inhibitor of protein phosphatase-1. *Nature* **310**, 503–505 (1984).
12. Esteve, P.-O. *et al.* Regulation of DNMT1 stability through SET7-mediated lysine methylation in mammalian cells. *Proc. Natl. Acad. Sci.* **106**, 5076–5081 (2009).
